# Supplementary material
Source: publisher site journal article supplement (https://www.dovepress.com/article/131661)
Supplement: Supplementary file 1 [file get_supplementary_file.php]

## **Appendix 1: ADI-R item No. 59 „SECURE BASE“.**

(THE PURPOSE OF THIS ITEM IS TO DETERMINE IF THE SUBJECT USES CAREGIVERS AS A “BASE” FROM WHICH HE/SHE CAN EXPLORE. TWO ASPECTS OF THE SUBJECT BEHAVIOR ARE IMPORTANT: 1) THE SUBJECT’S AWARENESS OF THE CAREGIVER’S LOCATION AND ATTENTION TO IT, AS EVIDENCED BY SEEKING PROXIMITY AND CHECKING BACK, AND 2) THE SUBJECT ABILITY TO THEN GO ON TO INTERACT OR EXPLORE IN A NEW SITUATION)

### *FOR SUBJECTS UNDER 4.0 YEARS:*

When \_\_\_\_\_ is playing, does he/she ever “check back” to see where you are when he/she is playing in another room – as if to make sure that everything is alright? What about if you’re together in a park or playground? Does he/she ever come back to you from time to time to make sure he/she knows where you are? Do you ever worry about his/her wandering off? How does he/she react if a stranger comes right up and tries to talk to him?

### *FOR SUBJECTS OVER 4.0 YEARS:*

When \_\_\_\_\_ was 4 to 5 years old, did he/she tend to “check back” to see where you were when he/she was playing in another room – as if to make sure that everything was alright? What about if you were together in a park or playground? Did he/she ever come back to you from time to time to make sure he/she knew where you were? Did you ever worry about his/her wandering off? Did he/she ever “check back” when younger than 4?

### *CODING:*

0 = uses parent (s) / caregiver as secure base, indicated by seeking proximity when approached by stranger and checking in when in a new situation, but, once settled, being able to interact or explore;

1 = occasionally uses parent (s) / caregiver as secure base, but with less frequency, spontaneity or more narrow range of contexts than “0”;

2 = seek parent (s) / caregiver primarily to avoid other social contact or out of fear; no use of parental / caregiver’s proximity to explore or interact;

3 = no seeking of parent (s) / caregiver in new situations;

7 = excessively clingy across a variety of situations;

8 = not applicable;

9 = not known or not asked.
